# Supplementary material for: Proteinase 3 on apoptotic cells disrupts immune silencing in autoimmune vasculitis
Source: JCI journal article supplement (doi:10.1172/jci78182), 2015-10-04
Supplement: sd1 [file 1]

Revision 2- Supplemental Figure 1  
Millet et al

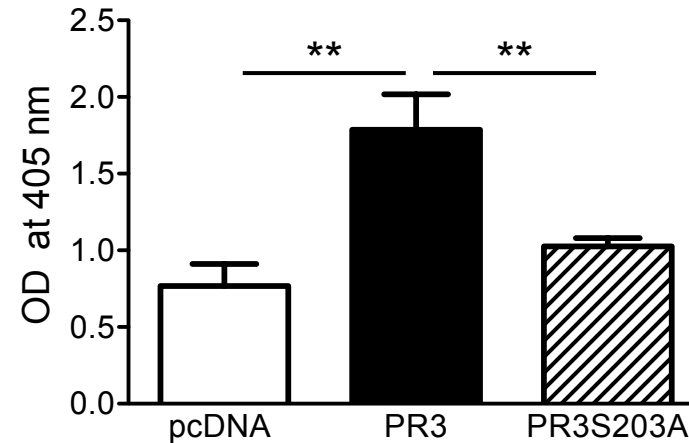

Supplemental Figure 1: PR3S203A is inactive enzymatically.

Control RBL transfected with the empty pcDNA plasmide, RBL/PR3 and RB/PR3S203A have been solubilized in PBS supplemented with 1% Triton-X100 and protein concentration has been adjusted at 0.5 mg/ml. Serine protease activity was measured using the chromogenic substrate Boc-Ala-Pro-Nval-SBzl and was quantified by the OD at 405 nm as previously described in Witko-Sarsat et al. 1999 Am J Resp Cell Mol Biol 20: 729-36.

Results are given as the mean  $\pm$  SEM from three independent experiments. (\*\*p<0.01, ANOVA)

A

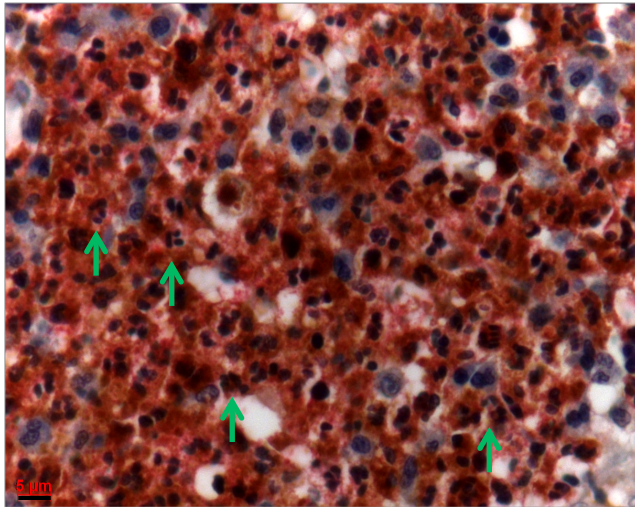

B

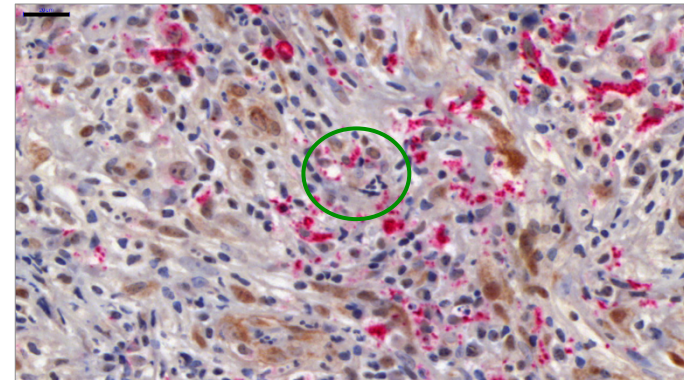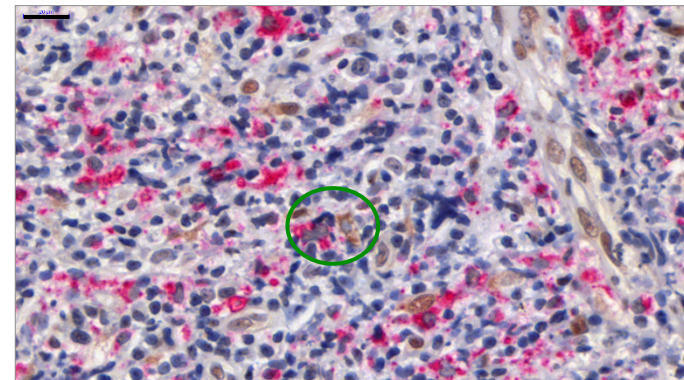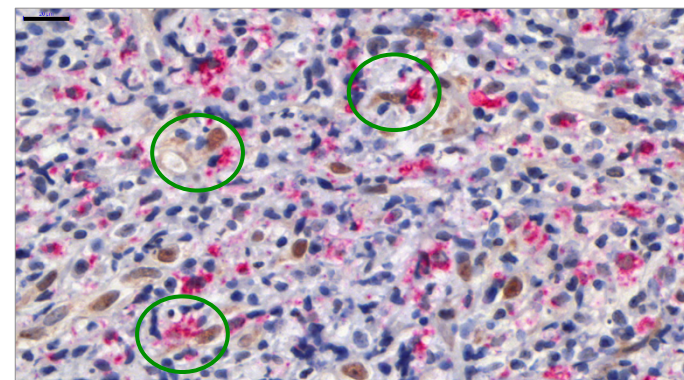

Supplemental Figure 2. Detection of pDC, macrophages and neutrophils, appearing in close vicinity in granulomatous inflammation, using IHC.

(A) Nuclei of PMN detected as PR3 (brown staining) and LL37 (red staining) forming a microabscess appear fragmented (green arrows), which may be indicative of ongoing karyorrhexis. Nuclei are counterstained in blue.

(B) Some CD123<sup>+</sup> cells (brown staining) are located near to CD68<sup>+</sup> cells (red staining, macrophages) and also to neutrophils in granulomatous inflammation of the upper respiratory tract in GPA (green circles). Nuclei are counterstained in blue. Data displays typical images representative of 6 GPA patients. Scale bars: 5  $\mu\text{m}$  (A) and 20  $\mu\text{m}$  (B)

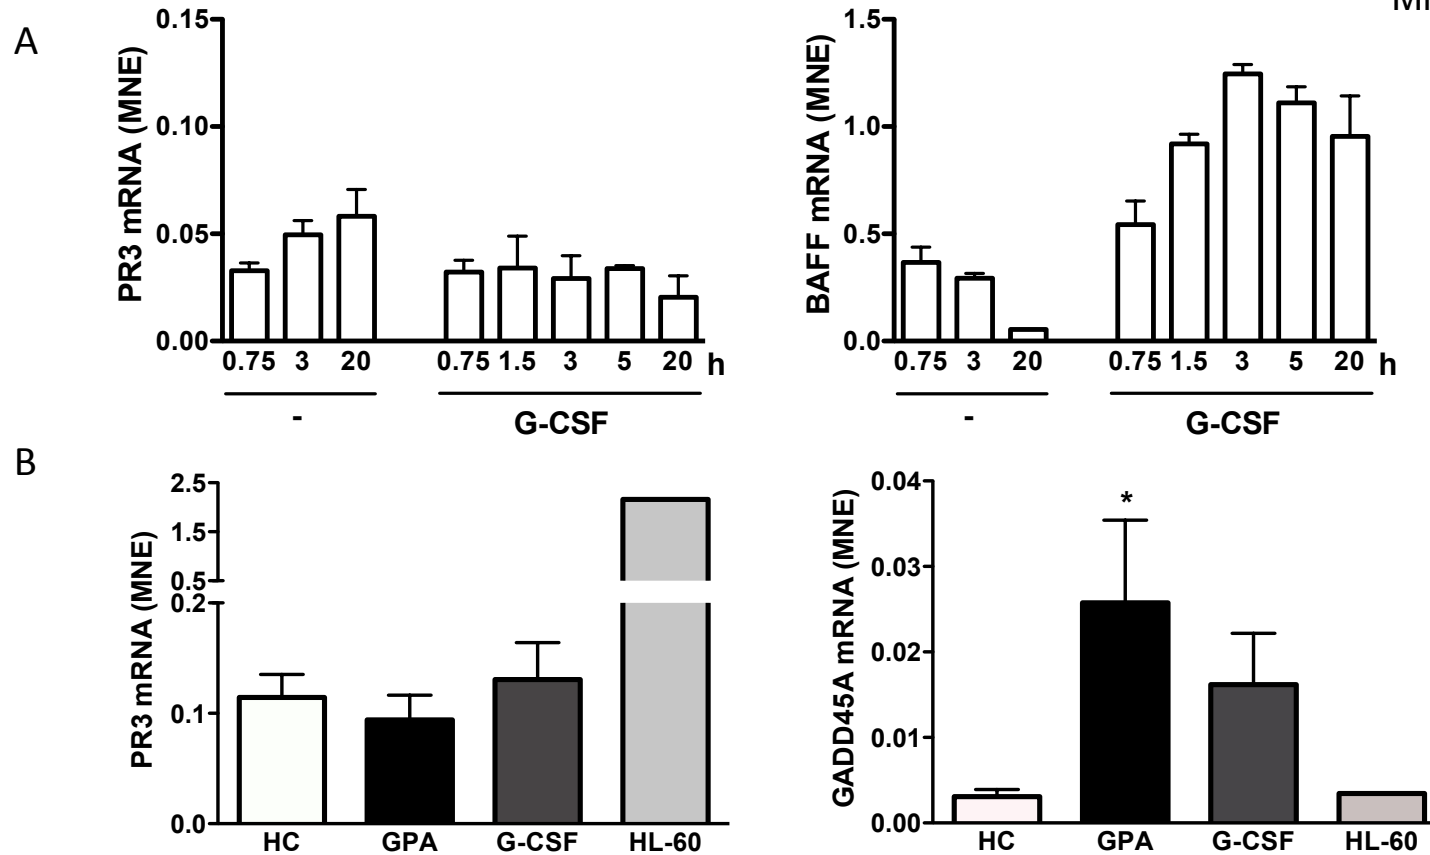

Supplemental Figure 3: G-CSF does not modulate PR3 mRNA expression.

(A) Incubation of neutrophils in vitro with G-CSF does not increase the levels of PR3 mRNA expression. Total RNA was extracted from neutrophils cultured with and without 1000 U/ml G-CSF for the times indicated, before measuring PR3, BAFF/BLyS, and RPL32/GADD45A mRNA expression by RT-qPCR. Data are depicted as mean normalized expression (MNE) units after RPL32 mRNA normalization. A representative experiment out of 3 is shown. Error bars represent standard errors calculated from triplicate qPCR reactions. (B) Neutrophils isolated from GPA patients, G-CSF-treated donors and healthy individuals express equivalent levels of PR3 mRNA. PR3 and GADD45A mRNA expression in neutrophils isolated from healthy donors (HD, n=13), GPA patients (GPA, n=13), G-CSF-treated donors (G-CSF, n=11) and HL-60 promyelocytic cells (HL-60), as revealed by RT-qPCR. Gene expression data (mean  $\pm$  SEM) are depicted as mean normalized expression (MNE) units after RPL32 mRNA normalization. \* $p < 0.05$ , by one-way ANOVA followed by Tukey's post test.

Revision 2- Supplemental Figure 4  
Millet et al

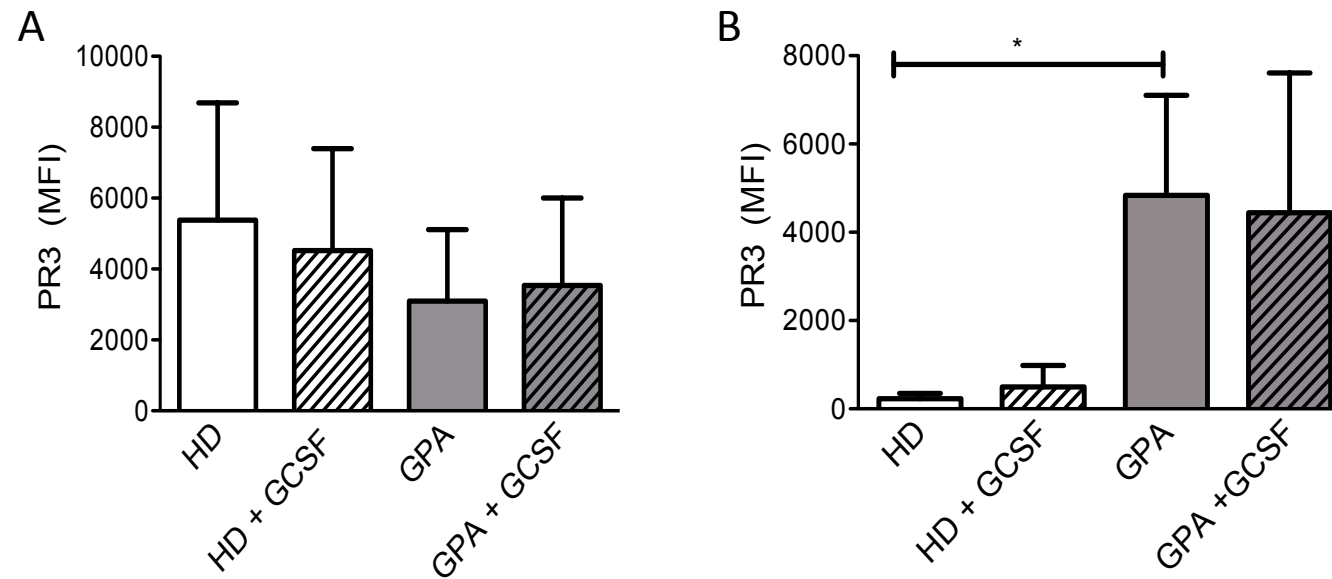

Supplemental Figure 4. Effect of G-CSF on membrane PR3 expression in basal and apoptotic isolated neutrophils from healthy donors and GPA patients.

(A) MFI of PR3 expression on neutrophils from healthy donors and GPA patients treated for 15 min with medium or G-CSF (B) Same as panel A using apoptotic neutrophils (Annexin V<sup>+</sup>7AAD<sup>-</sup>) from healthy controls and GPA patients. Data are presented as mean  $\pm$  SEM, n=7 in GPA and n=4 for healthy controls (HD). (\*  $p < 0.05$ , ANOVA).

### Supplemental table 1 Millet et al

*Supplemental table 1:* Clinical characteristics of patients included in the Neurovasc study (Cochin Hospital, Paris).

AZA: azathioprine; BVAS: Binmingham vasculitis activity score; ENT: ear, nose, throat; F: female; GPA: granulomatosis with polyangiitis; M: male; MPA: microscopic polyangiitis; MPO: microscopic polyangiitis; NA: not available; PR3: proteinase 3; pred: prednisone.

| Neurovasc patients | Diagnosis | Age/sex | Clinical manifestations                           | BVAS | CRP | ANCA     | Treatment at the time of disease flare |
|--------------------|-----------|---------|---------------------------------------------------|------|-----|----------|----------------------------------------|
| 1                  | GPA       | 58/M    | Fever, weight loss, ENT, lung                     | 12   | 195 | Anti-PR3 | no                                     |
| 2                  | GPA       | 85/F    | ENT, proteinuria, hematuria                       | 16   | 14  | Anti-PR3 | no                                     |
| 3                  | GPA       | 67/F    | ENT, lung, proteinuria, hematuria                 | 22   | 34  | Anti-PR3 | no                                     |
| 4                  | GPA       | 42/F    | ENT, lung, bowel                                  | 9    | 17  | Anti-PR3 | no                                     |
| 5                  | GPA       | 55/M    | Fever, myalgia, scleritis, lung                   | 11   | 257 | Anti-PR3 | no                                     |
| 6                  | GPA       | 58/M    | Fever, myalgia, ENT, lung, proteinuria, hematuria | 19   | 23  | Anti-PR3 | no                                     |
| 7                  | GPA       | 22/F    | Fever, weight loss, ENT, lung                     | 15   | 224 | Anti-PR3 | no                                     |
| 8                  | GPA       | 61/M    | Peripheral neuropathy                             | 9    | NA  | Anti-PR3 | AZA 100 mg/j + pred 20 mg/j            |
| 9                  | GPA       | 57/M    | Joint, ENT                                        | 7    | 1,3 | Anti-PR3 | AZA 100 mg/j                           |
| 10                 | GPA       | 61/M    | ENT, lung                                         | 11   | 14  | Anti-PR3 | no                                     |
| 11                 | GPA       | 50/F    | ENT, skin, hematuria                              | 14   | 9,3 | Anti-PR3 | no                                     |
| 12                 | GPA       | 27/M    | Fever, joint, ENT, lung, kidney                   | 25   | 64  | Anti-PR3 | no                                     |
| 13                 | GPA       | 24/M    | Fever, ENT, lung, kidney, skin                    | 26   | 72  | Anti-PR3 | no                                     |
| 14                 | GPA       | 48/M    | ENT, lung, hematuria                              | 18   | 183 | Anti-PR3 | no                                     |
| 15                 | GPA       | 61/M    | Weight loss, ENT, lung, peripheral neuropathy     | 20   | 57  | Anti-PR3 | no                                     |

## Supplemental table 2

Millet et al

*Supplemental table 2:* Clinical characteristics of patients included in the histopathology Study (Lübeck Hospital, Germany).

AZA: azathioprine; BVAS: Binmingham vasculitis activity score; ENT: ear, nose, throat; F: female; GPA: granulomatosis with polyangiitis; M: male; MPA: microscopic polyangiitis; MPO: microscopic polyangiitis; MTX: Methotrexate; NA: not available; PR3: proteinase 3; pred: prednisone

| Histo-pathology patients | Diagnosis | Age/sex | Clinical manifestations              | BVAS | CRP (mg l <sup>-1</sup> ) | ANCA     | Treatment at the time of biopsy |
|--------------------------|-----------|---------|--------------------------------------|------|---------------------------|----------|---------------------------------|
| 1                        | GPA       | 71/F    | ENT, myalgia                         | 8    | 4.9                       | Anti-PR3 | no                              |
| 2                        | GPA       | 41/F    | ENT, lung                            | 12   | 18                        | Anti-PR3 | MTX                             |
| 3                        | GPA       | 54/M    | fever, ENT, lung, arthralgia, kidney | 27   | 103                       | Anti-PR3 | no                              |
| 4                        | GPA       | 74/F    | ENT                                  | 6    | 2                         | negative | no                              |
| 5                        | GPA       | 69/F    | fever, ENT                           | 6    | 135                       | negative | MTX + pred                      |
| 6                        | GPA       | 49/M    | ENT, night sweat                     | 8    | 61                        | Anti-PR3 | no                              |
